# Supplementary material for: Advances in Thermal Image Analysis for the Detection of Pregnancy in Horses Using Infrared Thermography
Source: MDPI journal article supplement (doi:10.3390/s22010191), 2021-12-28
Supplement: s1 [file s1]

*Supplementary Data for*

# **Advances in thermal image analysis for the detection of pregnancy in horses using infrared thermography**

**Małgorzata Domino<sup>1</sup>, Marta Borowska<sup>2</sup>, Natalia Kozłowska<sup>1</sup>, Łukasz Zdrojkowski<sup>1\*</sup>, Tomasz Jasinski<sup>1</sup>, Graham Smyth<sup>3</sup>, Małgorzata Maśko<sup>4\*</sup>**

<sup>1</sup> Department of Large Animal Diseases and Clinic, Institute of Veterinary Medicine, Warsaw University of Life Sciences, Warsaw, Poland; [malgorzata\\_domino@sggw.edu.pl](mailto:malgorzata_domino@sggw.edu.pl); [natalia\\_kozlowska@sggw.edu.pl](mailto:natalia_kozlowska@sggw.edu.pl); [tomasz\\_jasinski@sggw.edu.pl](mailto:tomasz_jasinski@sggw.edu.pl);

<sup>2</sup> Institute of Biomedical Engineering, Faculty of Mechanical Engineering, Białystok University of Technology, Białystok, 15-351, Poland; [m.borowska@pb.edu.pl](mailto:m.borowska@pb.edu.pl)

<sup>3</sup> Menzies Health Institute Queensland and Griffith University School of Medicine, Southport, QLD, 4222, Australia; [grahamcsmyth@gmail.com](mailto:grahamcsmyth@gmail.com)

<sup>4</sup> Department of Animal Breeding, Institute of Animal Science, Warsaw University of Life Sciences, Warsaw, Poland;

\* Correspondence: [lukasz\\_zdrojkowski@sggw.edu.pl](mailto:lukasz_zdrojkowski@sggw.edu.pl) (Ł.Z.); [malgorzata\\_masko@sggw.edu.pl](mailto:malgorzata_masko@sggw.edu.pl) (M.M.)

**Table S1.** Features of Histogram Statistics (HS) for each examined color component in the non-pregnant group. When features did not differ significantly ( $p>0.05$ ) between consecutive months, the mean  $\pm$ SD value was calculated as shown in the table. When features differed significantly ( $p<0.05$ ), only p-values were given.

| Component |          | Mean        | Variance    | Skewness    | Kurtosis    | Perc01      | Perc10      | Perc50      | Perc90      | Perc99      | Maxm01      | Domn01      | Maxm10      | Domn10      |
|-----------|----------|-------------|-------------|-------------|-------------|-------------|-------------|-------------|-------------|-------------|-------------|-------------|-------------|-------------|
| R         | mean     | 245.5       | 149.9       | 3.061       | 18.04       | 203.5       | 234.5       | 248.9       | 252.0       | 253.0       | 0.204       | 251.7       | 0.889       | 237.0       |
|           | $\pm$ SD | $\pm 3.4$   | $\pm 215.4$ | $\pm 1.811$ | $\pm 30.30$ | $\pm 33.9$  | $\pm 11.3$  | $\pm 1.4$   | $\pm 0.2$   | $\pm 0.1$   | $\pm 0.061$ | $\pm 1.4$   | $\pm 0.081$ | $\pm 0.1$   |
|           | p        | 0.470       | 0.802       | 0.372       | 0.227       | 0.714       | 0.518       | 0.850       | 0.792       | 0.392       | 0.533       | 0.411       | 0.563       | 0.423       |
| G         | mean     | 117.0       | 3771        | 0.014       | -1.128      | 25.79       | 36.64       | 116.7       | 198.7       | 210.4       | 0.039       | 108.3       | 0.249       | 98.20       |
|           | $\pm$ SD | $\pm 24.0$  | $\pm 851$   | $\pm 0.530$ | $\pm 0.479$ | $\pm 7.93$  | $\pm 20.22$ | $\pm 40.3$  | $\pm 12.4$  | $\pm 4.4$   | $\pm 0.017$ | $\pm 93.9$  | $\pm 0.071$ | $\pm 85.36$ |
|           | p        | 0.332       | 0.194       | 0.318       | 0.695       | 0.743       | 0.473       | 0.245       | 0.341       | 0.559       | 0.974       | 0.604       | 0.341       | 0.559       |
| B         | mean     | 36.07       | 554.2       | -0.407      | -0.616      | 2.107       | 7.518       | 33.82       | 67.86       | 87.54       | 0.040       | 19.70       | 0.344       | 17.25       |
|           | $\pm$ SD | $\pm 11.08$ | $\pm 267.9$ | $\pm 0.381$ | $\pm 0.596$ | $\pm 2.612$ | $\pm 4.744$ | $\pm 14.33$ | $\pm 16.39$ | $\pm 18.92$ | $\pm 0.021$ | $\pm 25.91$ | $\pm 0.088$ | $\pm 23.17$ |
|           | p        | 0.404       | 0.310       | 0.201       | 0.127       | 0.533       | 0.475       | 0.400       | 0.283       | 0.643       | 0.239       | 0.324       | 0.279       | 0.460       |
| Y         | mean     | 146.3       | 1069        | 0.110       | -1.119      | 96.25       | 102.4       | 147.6       | 188.3       | 192.6       | 0.058       | 142.3       | 0.368       | 135.1       |
|           | $\pm$ SD | $\pm 12.5$  | $\pm 239$   | $\pm 0.549$ | $\pm 0.581$ | $\pm 4.43$  | $\pm 11.4$  | $\pm 21.4$  | $\pm 4.29$  | $\pm 1.1$   | $\pm 0.021$ | $\pm 48.6$  | $\pm 0.093$ | $\pm 41.6$  |
|           | p        | 0.342       | 0.158       | 0.308       | 0.520       | 0.220       | 0.390       | 0.252       | 0.250       | 0.150       | 0.503       | 0.451       | 0.900       | 0.368       |
| U         | mean     | 65.06       | 947.6       | -0.118      | -1.093      | 20.77       | 25.39       | 64.45       | 105.7       | 112.9       | 0.062       | 62.54       | 0.381       | 53.91       |
|           | $\pm$ SD | $\pm 13.01$ | $\pm 253.6$ | $\pm 0.560$ | $\pm 0.565$ | $\pm 1.51$  | $\pm 4.49$  | $\pm 22.02$ | $\pm 12.5$  | $\pm 6.2$   | $\pm 0.027$ | $\pm 46.13$ | $\pm 0.111$ | $\pm 39.18$ |
|           | p        | 0.319       | 0.193       | 0.341       | 0.491       | 0.144       | 0.387       | 0.370       | 0.246       | 0.230       | 0.372       | 0.317       | 0.912       | 0.102       |
| V         | mean     | 198.6       | 723.3       | 0.326       | -0.809      | 142.3       | 161.4       | 201.1       | 231.5       | 235.4       | 0.052       | 225.0       | 0.354       | 207.4       |
|           | $\pm$ SD | $\pm 10.4$  | $\pm 205.6$ | $\pm 0.430$ | $\pm 0.615$ | $\pm 15.8$  | $\pm 10.8$  | $\pm 15.2$  | $\pm 7.0$   | $\pm 2.6$   | $\pm 0.027$ | $\pm 24.2$  | $\pm 0.096$ | $\pm 23.3$  |
|           | p        | 0.274       | 0.391       | 0.388       | 0.516       | 0.709       | 0.469       | 0.233       | 0.232       | 0.247       | 0.469       | 0.619       | 0.258       | 0.856       |
| I         | mean     | 213.9       | 156.9       | 0.827       | 0.864       | 180.6       | 197.2       | 215.8       | 227.6       | 229.2       | 0.083       | 226.4       | 0.577       | 210.5       |
|           | $\pm$ SD | $\pm 4.5$   | $\pm 85.7$  | $\pm 0.563$ | $\pm 3.714$ | $\pm 17.0$  | $\pm 7.4$   | $\pm 5.0$   | $\pm 2.0$   | $\pm 0.7$   | $\pm 0.031$ | $\pm 6.2$   | $\pm 0.113$ | $\pm 5.3$   |
|           | p        | 0.327       | 0.494       | 0.823       | 0.770       | 0.684       | 0.451       | 0.243       | 0.192       | 0.396       | 0.290       | 0.180       | 0.416       | 0.765       |
| Q         | mean     | 29.4        | 1457        | 0.065       | -1.105      | 65.64       | 77.54       | 131.1       | 178.1       | 184.4       | 0.049       | 159.6       | 0.303       | 136.8       |
|           | $\pm$ SD | $\pm 15.5$  | $\pm 354$   | $\pm 0.509$ | $\pm 0.424$ | $\pm 6.21$  | $\pm 10.14$ | $\pm 25.6$  | $\pm 12.7$  | $\pm 5.10$  | $\pm 0.026$ | $\pm 47.0$  | $\pm 0.093$ | $\pm 47.6$  |
|           | p        | 0.321       | 0.423       | 0.311       | 0.639       | 0.651       | 0.407       | 0.333       | 0.513       | 0.093       | 0.268       | 0.389       | 0.198       | 0.969       |
| H         | mean     | 92.72       | 267.9       | -0.105      | -1.002      | 69.16       | 72.20       | 91.82       | 114.4       | 122.4       | 0.091       | 80.32       | 0.483       | 81.89       |
|           | $\pm$ SD | $\pm 6.72$  | $\pm 77.1$  | $\pm 0.510$ | $\pm 0.639$ | $\pm 2.45$  | $\pm 5.46$  | $\pm 11.12$ | $\pm 4.5$   | $\pm 8.0$   | $\pm 0.053$ | $\pm 19.33$ | $\pm 0.091$ | $\pm 16.82$ |
|           | p        | 0.306       | 0.278       | 0.440       | 0.577       | 0.260       | 0.192       | 0.326       | 0.470       | 0.623       | 0.382       | 0.785       | 0.386       | 0.240       |
| S         | mean     | 194.7       | 97.03       | 1.106       | 3.455       | 167.1       | 183.5       | 196.0       | -           | 205.0       | 206.8       | -           | 201.4       | -           |
|           | $\pm$ SD | $\pm 3.4$   | $\pm 91.46$ | $\pm 0.922$ | $\pm 5.831$ | $\pm 18.1$  | $\pm 8.4$   | $\pm 2.8$   |             | $\pm 0.700$ | $\pm 0.437$ |             | $\pm 7.2$   |             |
|           | p        | 0.363       | 0.955       | 0.349       | 0.190       | 0.849       | 0.747       | 0.320       | 0.033       | 0.338       | 0.628       | 0.301       | 0.816       | 0.015       |

R - Red component in the RGB color model; G - Green component in the RGB color model; B - Blue component in the RGB color model; Y - Brightness component in the YUV/YIQ/HSB color models; U - U-component in the YUV color model; V - V-component in the YUV color model; I - I-component in the YIQ color model; Q - Q-component in the YIQ color model; H - Hue component in the HSB color model; S - Saturation component in the HSB color model. Skewness - skewness coefficient; Perc01, Perc10, Perc50, Perc90, Perc99 - percentiles; Domn01, Domn10 - dominants; Maxm01, Maxm10 - maximum of moments; p - the level of marginal significance; SD - standard deviation.

**Table S2.** Features of the symmetric Gray Level Co-occurrence Matrix (GLCM) for each examined color component in the non-pregnant group. When features did not differ significantly ( $p>0.05$ ) between consecutive months, the mean  $\pm$ SD value was calculated as shown in the table.

| Component |          | AngScMom    | Contrast        | Correlat    | SumOfSqs    | InvDfMom    | SumAverg    | SumVarnc    | SumEntrp    | Entropy     | DifVarnc    | DifEntrp    |
|-----------|----------|-------------|-----------------|-------------|-------------|-------------|-------------|-------------|-------------|-------------|-------------|-------------|
| <b>R</b>  | mean     | 0.053       | 1.38 $\pm$ 1.86 | 0.990       | 149.1       | 0.765       | 493.0       | 595.0       | 1.481       | 1.707       | 1.019       | 0.422       |
|           | $\pm$ SD | $\pm$ 0.021 |                 | $\pm$ 0.007 | $\pm$ 215.1 | $\pm$ 0.046 | $\pm$ 6.8   | $\pm$ 859.4 | $\pm$ 0.172 | $\pm$ 0.227 | $\pm$ 1.535 | $\pm$ 0.078 |
|           | p        | 0.932       | 0.855           | 0.717       | 0.812       | 0.520       | 0.463       | 0.802       | 0.584       | 0.613       | 0.937       | 0.533       |
| <b>G</b>  | mean     | 0.003       | 22.59           | 0.997       | 3769        | 0.364       | 235.9       | 15055       | 2.456       | 3.255       | 12.50       | 0.979       |
|           | $\pm$ SD | $\pm$ 0.002 | $\pm$ 7.96      | $\pm$ 0.001 | $\pm$ 851   | $\pm$ 0.052 | $\pm$ 48.1  | $\pm$ 3404  | $\pm$ 0.061 | $\pm$ 0.136 | $\pm$ 4.25  | $\pm$ 0.070 |
|           | p        | 0.931       | 0.938           | 0.522       | 0.199       | 0.920       | 0.333       | 0.197       | 0.996       | 0.989       | 0.940       | 0.998       |
| <b>B</b>  | mean     | 0.005       | 3.200           | 0.997       | 554.3       | 0.558       | 74.22       | 2214        | 2.155       | 2.642       | 1.657       | 0.632       |
|           | $\pm$ SD | $\pm$ 0.003 | $\pm$ 1.204     | $\pm$ 0.002 | $\pm$ 268.0 | $\pm$ 0.059 | $\pm$ 22.19 | $\pm$ 1071  | $\pm$ 0.109 | $\pm$ 0.17  | $\pm$ 0.598 | $\pm$ 0.065 |
|           | p        | 0.117       | 0.941           | 0.389       | 0.310       | 0.680       | 0.404       | 0.310       | 0.108       | 0.258       | 0.989       | 0.885       |
| <b>Y</b>  | mean     | 0.006       | 7.374           | 0.996       | 1069        | 0.491       | 294.5       | 4269        | 2.163       | 2.752       | 4.151       | 0.770       |
|           | $\pm$ SD | $\pm$ 0.003 | $\pm$ 2.535     | $\pm$ 0.001 | $\pm$ 240   | $\pm$ 0.053 | $\pm$ 24.9  | $\pm$ 959   | $\pm$ 0.069 | $\pm$ 0.137 | $\pm$ 1.360 | $\pm$ 0.065 |
|           | p        | 0.425       | >0.999          | 0.370       | 0.162       | 0.868       | 0.343       | 0.164       | 0.902       | 0.887       | 0.965       | 0.996       |
| <b>U</b>  | mean     | 0.007       | 5.342           | 0.997       | 947.5       | 0.531       | 132.2       | 3785        | 2.148       | 2.674       | 3.023       | 0.709       |
|           | $\pm$ SD | $\pm$ 0.004 | $\pm$ 2.007     | $\pm$ 0.001 | $\pm$ 253.5 | $\pm$ 0.060 | $\pm$ 26.0  | $\pm$ 1014  | $\pm$ 0.087 | $\pm$ 0.165 | $\pm$ 1.066 | $\pm$ 0.070 |
|           | p        | 0.539       | 0.928           | 0.295       | 0.187       | 0.973       | 0.319       | 0.187       | 0.626       | 0.887       | 0.819       | 0.989       |
| <b>V</b>  | mean     | 0.005       | 4.190           | 0.997       | 722.4       | 0.520       | 399.3       | 2886        | 2.178       | 2.716       | 2.174       | 0.680       |
|           | $\pm$ SD | $\pm$ 0.003 | $\pm$ 1.464     | $\pm$ 0.001 | $\pm$ 205.5 | $\pm$ 0.408 | $\pm$ 20.8  | $\pm$ 822   | $\pm$ 0.089 | $\pm$ 0.114 | $\pm$ 0.782 | $\pm$ 0.053 |
|           | p        | 0.261       | 0.836           | 0.747       | 0.400       | 0.810       | 0.274       | 0.400       | 0.210       | 0.239       | 0.729       | 0.861       |
| <b>I</b>  | mean     | 0.014       | 1.297           | 0.995       | 156.5       | 0.676       | 429.8       | 624.8       | 1.851       | 2.170       | 0.728       | 0.476       |
|           | $\pm$ SD | $\pm$ 0.005 | $\pm$ 0.630     | $\pm$ 0.002 | $\pm$ 85.6  | $\pm$ 0.033 | $\pm$ 8.9   | $\pm$ 342.0 | $\pm$ 0.110 | $\pm$ 0.129 | $\pm$ 0.431 | $\pm$ 0.045 |
|           | p        | 0.142       | 0.959           | 0.653       | 0.511       | 0.706       | 0.327       | 0.511       | 0.260       | 0.134       | 0.995       | 0.969       |
| <b>Q</b>  | mean     | 0.004       | 7.868           | 0.997       | 1456        | 0.471       | 260.9       | 5815        | 2.282       | 2.898       | 4.321       | 0.783       |
|           | $\pm$ SD | $\pm$ 0.003 | $\pm$ 2.838     | $\pm$ 0.001 | $\pm$ 353   | $\pm$ 0.053 | $\pm$ 31.1  | $\pm$ 1414  | $\pm$ 0.073 | $\pm$ 0.130 | $\pm$ 1.500 | $\pm$ 0.068 |
|           | p        | 0.582       | 0.920           | 0.371       | 0.234       | 0.924       | 0.311       | 0.237       | 0.579       | 0.860       | 0.773       | 0.989       |
| <b>H</b>  | mean     | 0.016       | 1.510           | 0.997       | 267.8       | 0.682       | 187.4       | 1070        | 1.919       | 2.234       | 0.895       | 0.500       |
|           | $\pm$ SD | $\pm$ 0.011 | $\pm$ 0.541     | $\pm$ 0.001 | $\pm$ 77.1  | $\pm$ 0.049 | $\pm$ 13.5  | $\pm$ 308   | $\pm$ 0.091 | $\pm$ 0.134 | $\pm$ 0.296 | $\pm$ 0.053 |
|           | p        | 0.324       | 0.880           | 0.389       | 0.291       | 0.885       | 0.306       | 0.291       | 0.540       | 0.735       | 0.764       | 0.921       |
| <b>S</b>  | mean     | 0.011       | 2.793           | 0.983       | 97.06       | 0.587       | 391.4       | 385.4       | 1.731       | 2.189       | 1.545       | 0.594       |
|           | $\pm$ SD | $\pm$ 0.002 | $\pm$ 1.280     | $\pm$ 0.006 | $\pm$ 91.58 | $\pm$ 0.045 | $\pm$ 6.8   | $\pm$ 365.5 | $\pm$ 0.105 | $\pm$ 0.160 | $\pm$ 0.778 | $\pm$ 0.068 |
|           | p        | 0.884       | 0.932           | 0.959       | 0.950       | 0.947       | 0.366       | 0.946       | 0.823       | 0.822       | 0.874       | 0.861       |

R - Red component in the RGB color model; G - Green component in the RGB color model; B - Blue component in the RGB color model; Y - Brightness component in the YUV/YIQ/HSB color models; U - U-component in the YUV color model; V - V-component in the YUV color model; I - I-component in the YIQ color model; Q - Q-component in the YIQ color model; H - Hue component in the HSB color model; S - Saturation component in the HSB color model. AngScMom - angular second moment/energy; Correlat - correlation; SumOfSqs - sum of squares; InvDefMom - inverse different moment/homogeneity; SumAverg - summation mean; SumVarnc - summation variance; SumEntrp - summation entropy; DifVarnc - differential variance; DifEntrp - differential entropy; p - the level of marginal significance; SD - standard deviation.

**Table S3.** Features of the asymmetric Gray Level Co-occurrence Matrix (GLCH) for each examined color component in the non-pregnant group. When features did not differ significantly ( $p>0.05$ ) between consecutive months, the mean  $\pm$ SD value was calculated as shown in the table.

| Component |          | AngScMom    | Contrast    | Correlat    | SumOfSqs    | InvDfMom    | SumAverg    | SumVarnc    | SumEntrp    | Entropy     | DifVarnc    | DifEntrp    |
|-----------|----------|-------------|-------------|-------------|-------------|-------------|-------------|-------------|-------------|-------------|-------------|-------------|
| R         | mean     | 0.052       | 1.384       | 0.990       | 148.7       | 0.765       | 493.0       | 595.0       | 1.481       | 1.703       | 1.019       | 0.422       |
|           | $\pm$ SD | $\pm 0.021$ | $\pm 1.861$ | $\pm 0.007$ | $\pm 215.5$ | $\pm 0.046$ | $\pm 6.8$   | $\pm 859.4$ | $\pm 0.172$ | $\pm 0.24$  | $\pm 1.535$ | $\pm 0.078$ |
|           | p        | 0.823       | 0.855       | 0.748       | 0.810       | 0.520       | 0.463       | 0.802       | 0.584       | 0.608       | 0.937       | 0.533       |
| G         | mean     | 0.003       | 22.59       | 0.997       | 3766        | 0.364       | 235.9       | 15055       | 2.456       | 3.238       | 12.50       | 0.979       |
|           | $\pm$ SD | $\pm 0.002$ | $\pm 7.96$  | $\pm 0.001$ | $\pm 851$   | $\pm 0.052$ | $\pm 48.1$  | $\pm 3404$  | $\pm 0.061$ | $\pm 0.136$ | $\pm 4.25$  | $\pm 0.070$ |
|           | p        | 0.970       | 0.998       | 0.493       | 0.201       | 0.963       | 0.277       | 0.197       | 0.985       | 0.977       | 0.940       | 0.998       |
| B         | mean     | 0.005       | 3.200       | 0.997       | 554.0       | 0.558       | 74.22       | 2214        | 2.155       | 2.636       | 1.657       | 0.632       |
|           | $\pm$ SD | $\pm 0.003$ | $\pm 1.204$ | $\pm 0.002$ | $\pm 267.8$ | $\pm 0.059$ | $\pm 22.19$ | $\pm 1071$  | $\pm 0.109$ | $\pm 0.176$ | $\pm 0.598$ | $\pm 0.065$ |
|           | p        | 0.118       | 0.941       | 0.377       | 0.310       | 0.680       | 0.404       | 0.310       | 0.108       | 0.240       | 0.989       | 0.885       |
| Y         | mean     | 0.006       | 7.374       | 0.996       | 1069        | 0.491       | 294.5       | 4269        | 2.163       | 2.744       | 4.151       | 0.770       |
|           | $\pm$ SD | $\pm 0.003$ | $\pm 2.535$ | $\pm 0.001$ | $\pm 239$   | $\pm 0.053$ | $\pm 24.9$  | $\pm 958$   | $\pm 0.070$ | $\pm 0.137$ | $\pm 1.360$ | $\pm 0.065$ |
|           | p        | 0.435       | $>0.999$    | 0.339       | 0.167       | 0.868       | 0.343       | 0.164       | 0.902       | 0.875       | 0.964       | 0.996       |
| U         | mean     | 0.007       | 5.342       | 0.997       | 946.8       | 0.531       | 132.2       | 3785        | 2.148       | 2.674       | 3.023       | 0.709       |
|           | $\pm$ SD | $\pm 0.004$ | $\pm 2.007$ | $\pm 0.001$ | $\pm 253.3$ | $\pm 0.060$ | $\pm 26.0$  | $\pm 1014$  | $\pm 0.087$ | $\pm 0.165$ | $\pm 1.066$ | $\pm 0.070$ |
|           | p        | 0.539       | 0.928       | 0.318       | 0.195       | 0.973       | 0.319       | 0.187       | 0.626       | 0.897       | 0.819       | 0.989       |
| V         | mean     | 0.005       | 4.190       | 0.997       | 721.4       | 0.520       | 399.3       | 2886        | 2.178       | 2.718       | 2.174       | 0.680       |
|           | $\pm$ SD | $\pm 0.003$ | $\pm 1.464$ | $\pm 0.001$ | $\pm 205.7$ | $\pm 0.408$ | $\pm 20.8$  | $\pm 822$   | $\pm 0.089$ | $\pm 0.089$ | $\pm 0.782$ | $\pm 0.053$ |
|           | p        | 0.257       | 0.836       | 0.721       | 0.426       | 0.810       | 0.274       | 0.400       | 0.210       | 0.224       | 0.729       | 0.861       |
| I         | mean     | 0.014       | 1.297       | 0.995       | 156.2       | 0.676       | 429.8       | 624.8       | 1.851       | 2.166       | 0.728       | 0.476       |
|           | $\pm$ SD | $\pm 0.005$ | $\pm 0.630$ | $\pm 0.002$ | $\pm 85.7$  | $\pm 0.033$ | $\pm 8.9$   | $\pm 342.0$ | $\pm 0.110$ | $\pm 0.128$ | $\pm 0.431$ | $\pm 0.045$ |
|           | p        | 0.134       | 0.959       | 0.656       | 0.527       | 0.706       | 0.327       | 0.511       | 0.260       | 0.130       | 0.995       | 0.969       |
| Q         | mean     | 0.004       | 7.868       | 0.997       | 1454        | 0.471       | 260.9       | 5815        | 2.282       | 2.889       | 4.321       | 0.783       |
|           | $\pm$ SD | $\pm 0.003$ | $\pm 2.838$ | $\pm 0.001$ | $\pm 356$   | $\pm 0.053$ | $\pm 31.1$  | $\pm 1414$  | $\pm 0.073$ | $\pm 0.131$ | $\pm 1.500$ | $\pm 0.068$ |
|           | p        | 0.587       | 0.920       | 0.350       | 0.266       | 0.924       | 0.311       | 0.237       | 0.579       | 0.855       | 0.773       | 0.989       |
| H         | mean     | 0.016       | 1.510       | 0.997       | 267.5       | 0.682       | 187.4       | 1070        | 1.919       | 2.229       | 0.895       | 0.500       |
|           | $\pm$ SD | $\pm 0.011$ | $\pm 0.541$ | $\pm 0.001$ | $\pm 77.2$  | $\pm 0.049$ | $\pm 13.5$  | $\pm 308$   | $\pm 0.091$ | $\pm 0.135$ | $\pm 0.296$ | $\pm 0.053$ |
|           | p        | 0.324       | 0.880       | 0.374       | 0.290       | 0.885       | 0.306       | 0.291       | 0.540       | 0.696       | 0.764       | 0.921       |
| S         | mean     | 0.011       | 2.793       | 0.983       | 97.13       | 0.587       | 391.4       | 385.4       | 1.731       | 2.189       | 1.545       | 0.594       |
|           | $\pm$ SD | $\pm 0.003$ | $\pm 1.280$ | $\pm 0.006$ | $\pm 91.69$ | $\pm 0.045$ | $\pm 6.8$   | $\pm 365.5$ | $\pm 0.105$ | $\pm 0.160$ | $\pm 0.778$ | $\pm 0.068$ |
|           | p        | 0.889       | 0.932       | 0.959       | 0.950       | 0.947       | 0.366       | 0.946       | 0.823       | 0.814       | 0.874       | 0.861       |

R - Red component in the RGB color model; G - Green component in the RGB color model; B - Blue component in the RGB color model; Y - Brightness component in the YUV/YIQ/HSB color models; U - U-component in the YUV color model; V - V-component in the YUV color model; I - I-component in the YIQ color model; Q - Q-component in the YIQ color model; H - Hue component in the HSB color model; S - Saturation component in the HSB color model. AngScMom - angular second moment/energy; Correlat - correlation; SumOfSqs - sum of squares; InvDefMom - inverse different moment/homogeneity; SumAverg - summation mean; SumVarnc - summation variance; SumEntrp - summation entropy; DifVarnc - differential variance; DifEntrp - differential entropy; p - the level of marginal significance; SD - standard deviation.

**Table S4.** Comparison of Histogram Statistics (HS) features for each examined color component between the non-pregnant and pregnant groups. When features differed significantly ( $p < 0.05$ ) between the non-pregnant group and pregnant group for consecutive months, the number of month (mo) was noted. When the groups differed from a given month to the end of pregnancy, the value was marked in bold.

| Component |            | Mean        | Variance | Skewness      | Kurtosis           | Perc01        | Perc10  | Perc50                | Perc90        | Perc99     | Maxm01      | Domn01  | Maxm10         | Domn10     |
|-----------|------------|-------------|----------|---------------|--------------------|---------------|---------|-----------------------|---------------|------------|-------------|---------|----------------|------------|
| R         | NP/P diff. | 5-11 mo     | 5-11 mo  | 6-11 mo       | 6-11 mo            | 5-11 mo       | 5-11 mo | 5-11 mo               | 6-11 mo       | 6-11 mo    | 7-11 mo     | 6-11 mo | 5-11 mo        | 6, 8-11 mo |
|           | p          | <0.0001     | <0.0001  | <0.0001       | <0.0001            | <0.0001       | <0.0001 | <0.0001               | <0.0001       | <0.0001    | <0.0001     | <0.0001 | <0.0001        | <0.0001    |
| G         | NP/P diff. | 5-11 mo     | 7-11 mo  | 4-11 mo       | 6, 8-11 mo         | 6-11 mo       | 6-11 mo | 4-11 mo               | 4, 5, 11 mo   | 4 mo       | 4 mo        | 4 mo    | 4, 5, 7-11 mo  | 4, 5 mo    |
|           | p          | <0.0001     | <0.0001  | <0.0001       | <0.0001            | <0.0001       | <0.0001 | <0.0001               | <0.0001       | 0.0009     | 0.007       | 0.002   | <0.0001        | 0.013      |
| B         | NP/P diff. | 6, 9, 10 mo | 6-11 mo  | 5, 7-11 mo    | 5, 7, 8, 10, 11 mo | 4-11 mo       | 5-11 mo | 4, 5, 7, 8, 10, 11 mo | 6, 7, 9-11 mo | 6-11 mo    | 4-11 mo     | 4-11 mo | 6, 8, 9, 11 mo | 5-11 mo    |
|           | p          | <0.0001     | <0.0001  | <0.0001       | <0.0001            | <0.0001       | <0.0001 | <0.0001               | <0.0001       | <0.0001    | <0.0001     | <0.0001 | <0.0001        | <0.0001    |
| Y         | NP/P diff. | 4, 5 mo     | 5 mo     | 4, 5, 7, 8 mo | 4, 5, 7, 8 mo      | 6, 7, 9-11 mo | 4, 5 mo | 4, 5 mo               | 6 mo          | 6-11 mo    | 6, 9, 10 mo | -       | 4 mo           | -          |
|           | p          | 0.0007      | 0.001    | <0.0001       | 0.0001             | <0.0001       | 0.0005  | 0.002                 | 0.009         | <0.0001    | <0.0001     | 0.158   | 0.013          | 0.977      |
| U         | NP/P diff. | 5 mo        | 6-11 mo  | 4, 5, 7-11 mo | 4, 5, 7-11 mo      | 4 mo          | 4 mo    | 4, 5, 7, 8 mo         | 6, 7, 9-11 mo | 6-11 mo    | 4 mo        | -       | 4 mo           | -          |
|           | p          | 0.0002      | <0.0001  | <0.0001       | <0.0001            | 0.024         | 0.025   | <0.0001               | <0.0001       | <0.0001    | 0.002       | 0.0750  | 0.007          | 0.427      |
| V         | NP/P diff. | 6-11 mo     | 10-11 mo | 6, 9-11 mo    | 4, 5 mo            | 5-11 mo       | 5-11 mo | 6-11 mo               | 6-11 mo       | 6-11 mo    | 5, 7-11 mo  | 6-11 mo | 5, 7-11 mo     | 6-11 mo    |
|           | p          | <0.0001     | <0.0001  | <0.0001       | 0.0008             | <0.0001       | <0.0001 | <0.0001               | <0.0001       | <0.0001    | <0.0001     | <0.0001 | <0.0001        | <0.0001    |
| I         | NP/P diff. | 5-11 mo     | 5-11 mo  | 6 mo          | 9-10 mo            | 5-11 mo       | 5-11 mo | 5-11 mo               | 6-11 mo       | 6-11 mo    | 6-11 mo     | 6-11 mo | 6-11 mo        | 6-11 mo    |
|           | p          | <0.0001     | <0.0001  | 0.028         | <0.0001            | <0.0001       | <0.0001 | <0.0001               | <0.0001       | <0.0001    | <0.0001     | <0.0001 | <0.0001        | <0.0001    |
| Q         | NP/P diff. | 5-11 mo     | 7-11 mo  | 5, 7-11 mo    | 7-11 mo            | 4-11 mo       | 5-11 mo | 5-11 mo               | 7-11 mo       | 6-11 mo    | -           | 5-11 mo | 7-11 mo        | 5-11 mo    |
|           | p          | <0.0001     | <0.0001  | <0.0001       | <0.0001            | <0.0001       | <0.0001 | <0.0001               | <0.0001       | <0.0001    | 0.1508      | <0.0001 | <0.0001        | <0.0001    |
| H         | NP/P diff. | 5-11 mo     | 6-11 mo  | 7, 8, 11 mo   | 4, 5, 7, 8, 11 mo  | 6-11 mo       | 6-11 mo | 5-11 mo               | 5-11 mo       | 5-11 mo    | 5-11 mo     | 5-11 mo | 6-11 mo        | 5-11 mo    |
|           | p          | <0.0001     | <0.0001  | <0.0001       | <0.0001            | <0.0001       | <0.0001 | <0.0001               | <0.0001       | <0.0001    | <0.0001     | <0.0001 | <0.0001        | <0.0001    |
| S         | NP/P diff. | 6-11 mo     | 6-11 mo  | 5 mo          | 10, 11 mo          | 6-11 mo       | 6-11 mo | 6-11 mo               | -             | 6, 8-11 mo | 6-11 mo     | -       | 6-11 mo        | -          |
|           | p          | <0.0001     | <0.0001  | 0.0002        | <0.0001            | <0.0001       | <0.0001 | <0.0001               | -             | <0.0001    | <0.0001     | -       | <0.0001        | -          |

R – Red component in the RGB color model; G – Green component in the RGB color model; B – Blue component in the RGB color model; Y – Brightness component in the YUV/YIQ/HSB color models; U – U-component in the YUV color model; V – V-component in the YUV color model; I – I-component in the YIQ color model; Q – Q-component in the YIQ color model; H – Hue component in the HSB color model; S – Saturation component in the HSB color model. Skewness – skewness coefficient; Perc01, Perc10, Perc50, Perc90, Perc99 – percentiles; Domn01, Domn10 – dominants; Maxm01, Maxm10 – maximum of moments; p – the level of marginal significance; NP/P diff. – differences between non-pregnant and pregnant groups.

**Table S5.** Comparison of the symmetric Gray Level Co-occurrence Matrix (GLCM) features for each examined color component between the non-pregnant and pregnant groups. When features differed significantly ( $p < 0.05$ ) between the non-pregnant group and pregnant groups for consecutive months, the number of month (mo) was noted. When the groups differed from a given month to the end of pregnancy, the value was marked in bold.

| Component |            | AngScMom       | Contrast       | Correlat       | SumOfSqs       | InvDfMom       | SumAverg       | SumVarnc       | SumEntrp        | Entropy        | DifVarnc       | DifEntrp       |
|-----------|------------|----------------|----------------|----------------|----------------|----------------|----------------|----------------|-----------------|----------------|----------------|----------------|
| R         | NP/P diff. | 5, 7-11 mo     | <b>5-11 mo</b> | 4, 7 mo        | <b>5-11 mo</b>  | <b>5-11 mo</b> | <b>5-11 mo</b> | <b>5-11 mo</b> |
|           | p          | <0.0001        | <0.0001        | <0.0001        | <0.0001        | <0.0001        | <0.0001        | <0.0001        | <0.0001         | <0.0001        | <0.0001        | <0.0001        |
| G         | NP/P diff. | 4 mo           | 8, 9 mo        | <b>7-11 mo</b> | <b>7-11 mo</b> | 4, 8, 9 mo     | <b>5-11 mo</b> | <b>7-11 mo</b> | 4, 7-11 mo      | 4 mo           | 8-10 mo        | 4, 8, 9 mo     |
|           | p          | 0.001          | <0.0001        | <0.0001        | <0.0001        | <0.0001        | <0.0001        | <0.0001        | <0.0001         | 0.0007         | <0.0001        | <0.0001        |
| B         | NP/P diff. | 4, 5, 11 mo    | <b>6-11 mo</b> | 5, 8-11 mo     | <b>6-11 mo</b> | <b>6-11 mo</b> | 6, 9, 10 mo    | <b>6-11 mo</b> | 6, 9 mo         | 6, 8-11 mo     | <b>6-11 mo</b> | <b>6-11 mo</b> |
|           | p          | 0.0004         | <0.0001        | <0.0001        | <0.0001        | <0.0001        | <0.0001        | <0.0001        | <0.0001         | <0.0001        | <0.0001        | <0.0001        |
| Y         | NP/P diff. | 6, 8-11 mo     | <b>8-11 mo</b> | 5, 7-11 mo     | 5 mo           | <b>8-11 mo</b> | 4, 5 mo        | 5 mo           | 6, 9-11 mo      | <b>6-11 mo</b> | <b>6-11 mo</b> | <b>8-11 mo</b> |
|           | p          | <0.0001        | <0.0001        | <0.0001        | 0.001          | <0.0001        | 0.0006         | 0.002          | <0.0001         | <0.0001        | <0.0001        | <0.0001        |
| U         | NP/P diff. | 4, 9, 10 mo    | <b>6-11 mo</b> | 5, 8-11 mo     | <b>6-11 mo</b> | <b>6-11 mo</b> | 5 mo           | <b>6-11 mo</b> | 6, 9-11 mo      | <b>6-11 mo</b> | <b>6-11 mo</b> | <b>6-11 mo</b> |
|           | p          | <0.0001        | <0.0001        | <0.0001        | <0.0001        | <0.0001        | 0.0002         | <0.0001        | <0.0001         | <0.0001        | <0.0001        | <0.0001        |
| V         | NP/P diff. | <b>5-11 mo</b> | <b>6-11 mo</b> | 8-10 mo        | <b>6-11 mo</b> | <b>6-11 mo</b> | <b>5-11 mo</b> | <b>6-11 mo</b> | <b>5-11 mo</b>  | <b>5-11 mo</b> | <b>6-11 mo</b> | <b>6-11 mo</b> |
|           | p          | <0.0001        | <0.0001        | <0.0001        | <0.0001        | <0.0001        | <0.0001        | <0.0001        | <0.0001         | <0.0001        | <0.0001        | <0.0001        |
| I         | NP/P diff. | <b>5-11 mo</b> | <b>6-11 mo</b> | 4 mo           | <b>5-11 mo</b> | <b>6-11 mo</b> | <b>5-11 mo</b> | <b>5-11 mo</b> | <b>5-11 mo</b>  | <b>5-11 mo</b> | <b>6-11 mo</b> | 4, 6, 7 mo     |
|           | p          | <0.0001        | <0.0001        | <0.0001        | <0.0001        | <0.0001        | <0.0001        | <0.0001        | <0.0001         | <0.0001        | <0.0001        | <0.0001        |
| Q         | NP/P diff. | -              | <b>8-11 mo</b> | <b>7-11 mo</b> | <b>7-11 mo</b> | 4, 8-10 mo     | <b>5-11 mo</b> | <b>7-11 mo</b> | 7, 8, 10, 11 mo | 4 mo           | 8-10 mo        | 8, 9, 10 mo    |
|           | p          | 0.137          | <0.0001        | <0.0001        | <0.0001        | <0.0001        | <0.0001        | <0.0001        | <0.0001         | 0.004          | <0.0001        | <0.0001        |
| H         | NP/P diff. | <b>6-11 mo</b> | <b>6-11 mo</b> | <b>8-11 mo</b> | <b>6-11 mo</b> | <b>6-11 mo</b> | <b>5-11 mo</b> | <b>6-11 mo</b> | <b>6-11 mo</b>  | <b>6-11 mo</b> | <b>6-11 mo</b> | <b>6-11 mo</b> |
|           | p          | <0.0001        | <0.0001        | <0.0001        | <0.0001        | <0.0001        | <0.0001        | <0.0001        | <0.0001         | <0.0001        | <0.0001        | <0.0001        |
| S         | NP/P diff. | <b>6-11 mo</b> | <b>6-11 mo</b> | 4, 9 mo        | <b>6-11 mo</b>  | <b>6-11 mo</b> | <b>6-11 mo</b> | <b>6-11 mo</b> |
|           | p          | <0.0001        | <0.0001        | 0.0004         | <0.0001        | <0.0001        | <0.0001        | <0.0001        | <0.0001         | <0.0001        | <0.0001        | <0.0001        |

R – Red component in the RGB color model; G – Green component in the RGB color model; B – Blue component in the RGB color model; Y – Brightness component in the YUV/YIQ/HSB color models; U – U-component in the YUV color model; V – V-component in the YUV color model; I – I-component in the YIQ color model; Q – Q-component in the YIQ color model; H – Hue component in the HSB color model; S – Saturation component in the HSB color model. AngScMom – angular second moment/energy; Correlat – correlation; SumOfSqs – sum of squares; InvDefMom – inverse different moment/homogeneity; SumAverg – summation mean; SumVarnc – summation variance; SumEntrp – summation entropy; DifVarnc – differential variance; DifEntrp – differential entropy; p – the level of marginal significance; NP/P diff. – differences between non-pregnant and pregnant groups.

**Table S6.** Comparison of the asymmetric Gray Level Co-occurrence Matrix (GLCH) features for each examined color component between the non-pregnant and pregnant groups. When features differed significantly ( $p < 0.05$ ) between the non-pregnant group and pregnant groups for consecutive months, the number of month (mo) was noted. When the groups differed from a given month to the end of pregnancy, the value was marked in bold.

| Component |            | AngScMom       | Contrast       | Correlat       | SumOfSqs       | InvDfMom       | SumAverg       | SumVarnc       | SumEntrp        | Entropy        | DifVarnc       | DifEntrp       |
|-----------|------------|----------------|----------------|----------------|----------------|----------------|----------------|----------------|-----------------|----------------|----------------|----------------|
| R         | NP/P diff. | 5, 7-11 mo     | <b>5-11 mo</b> | 4, 7 mo        | <b>5-11 mo</b>  | <b>5-11 mo</b> | <b>5-11 mo</b> | <b>5-11 mo</b> |
|           | p          | <0.0001        | <0.0001        | <0.0001        | <0.0001        | <0.0001        | <0.0001        | <0.0001        | <0.0001         | <0.0001        | <0.0001        | <0.0001        |
| G         | NP/P diff. | 4 mo           | 8, 9 mo        | <b>7-11 mo</b> | <b>7-11 mo</b> | 4, 8, 9 mo     | <b>5-11 mo</b> | <b>7-11 mo</b> | 4, 7-11 mo      | 4 mo           | 8-10 mo        | 4, 8, 9 mo     |
|           | p          | 0.001          | <0.0001        | <0.0001        | <0.0001        | <0.0001        | <0.0001        | <0.0001        | <0.0001         | 0.0009         | <0.0001        | <0.0001        |
| B         | NP/P diff. | 4, 5, 11 mo    | <b>6-11 mo</b> | 5, 8-11 mo     | <b>6-11 mo</b> | <b>6-11 mo</b> | 6, 9, 10 mo    | <b>6-11 mo</b> | 6, 9 mo         | 6, 8-11 mo     | <b>6-11 mo</b> | <b>6-11 mo</b> |
|           | p          | 0.0005         | <0.0001        | <0.0001        | <0.0001        | <0.0001        | <0.0001        | <0.0001        | <0.0001         | <0.0001        | <0.0001        | <0.0001        |
| Y         | NP/P diff. | 6, 8-11 mo     | <b>8-11 mo</b> | 5, 7-11 mo     | 5 mo           | <b>8-11 mo</b> | 4, 5 mo        | 5 mo           | 6, 9-11 mo      | <b>6-11 mo</b> | <b>6-11 mo</b> | <b>8-11 mo</b> |
|           | p          | <0.0001        | <0.0001        | <0.0001        | 0.001          | <0.0001        | 0.0006         | 0.002          | <0.0001         | <0.0001        | <0.0001        | <0.0001        |
| U         | NP/P diff. | 4, 9, 10 mo    | <b>6-11 mo</b> | 5, 8-11 mo     | <b>6-11 mo</b> | <b>6-11 mo</b> | 5 mo           | <b>6-11 mo</b> | 6, 9-11 mo      | <b>6-11 mo</b> | <b>6-11 mo</b> | <b>6-11 mo</b> |
|           | p          | <0.0001        | <0.0001        | <0.0001        | <0.0001        | <0.0001        | 0.0002         | <0.0001        | <0.0001         | <0.0001        | <0.0001        | <0.0001        |
| V         | NP/P diff. | <b>5-11 mo</b> | <b>6-11 mo</b> | 8-10 mo        | <b>6-11 mo</b> | <b>6-11 mo</b> | <b>5-11 mo</b> | <b>6-11 mo</b> | <b>5-11 mo</b>  | <b>5-11 mo</b> | <b>6-11 mo</b> | <b>6-11 mo</b> |
|           | p          | <0.0001        | <0.0001        | <0.0001        | <0.0001        | <0.0001        | <0.0001        | <0.0001        | <0.0001         | <0.0001        | <0.0001        | <0.0001        |
| I         | NP/P diff. | <b>5-11 mo</b> | <b>6-11 mo</b> | 4 mo           | <b>5-11 mo</b> | <b>6-11 mo</b> | <b>5-11 mo</b> | <b>5-11 mo</b> | <b>5-11 mo</b>  | <b>5-11 mo</b> | <b>6-11 mo</b> | 4, 6, 7 mo     |
|           | p          | <0.0001        | <0.0001        | <0.0001        | <0.0001        | <0.0001        | <0.0001        | <0.0001        | <0.0001         | <0.0001        | <0.0001        | <0.0001        |
| Q         | NP/P diff. | -              | <b>8-11 mo</b> | <b>7-11 mo</b> | <b>7-11 mo</b> | 4, 8-10 mo     | <b>5-11 mo</b> | <b>7-11 mo</b> | 7, 8, 10, 11 mo | 4 mo           | 8-10 mo        | 8, 9, 10 mo    |
|           | p          | 0.137          | <0.0001        | <0.0001        | <0.0001        | <0.0001        | <0.0001        | <0.0001        | <0.0001         | 0.004          | <0.0001        | <0.0001        |
| H         | NP/P diff. | <b>6-11 mo</b> | <b>6-11 mo</b> | <b>8-11 mo</b> | <b>6-11 mo</b> | <b>6-11 mo</b> | <b>5-11 mo</b> | <b>6-11 mo</b> | <b>6-11 mo</b>  | <b>6-11 mo</b> | <b>6-11 mo</b> | <b>6-11 mo</b> |
|           | p          | <0.0001        | <0.0001        | <0.0001        | <0.0001        | <0.0001        | <0.0001        | <0.0001        | <0.0001         | <0.0001        | <0.0001        | <0.0001        |
| S         | NP/P diff. | <b>6-11 mo</b> | <b>6-11 mo</b> | 4, 9 mo        | <b>6-11 mo</b>  | <b>6-11 mo</b> | <b>6-11 mo</b> | <b>6-11 mo</b> |
|           | p          | <0.0001        | <0.0001        | 0.0004         | <0.0001        | <0.0001        | <0.0001        | <0.0001        | <0.0001         | <0.0001        | <0.0001        | <0.0001        |

R – Red component in the RGB color model; G – Green component in the RGB color model; B – Blue component in the RGB color model; Y – Brightness component in the YUV/YIQ/HSB color models; U – U-component in the YUV color model; V – V-component in the YUV color model; I – I-component in the YIQ color model; Q – Q-component in the YIQ color model; H – Hue in the HSB component color model; S – Saturation component in the HSB color model. AngScMom – angular second moment/energy; Correlat – correlation; SumOfSqs – sum of squares; InvDefMom – inverse different moment/homogeneity; SumAverg – summation mean; SumVarnc – summation variance; SumEntrp – summation entropy; DifVarnc – differential variance; DifEntrp – differential entropy; p – the level of marginal significance; NP/P diff. – differences between non-pregnant and pregnant groups.

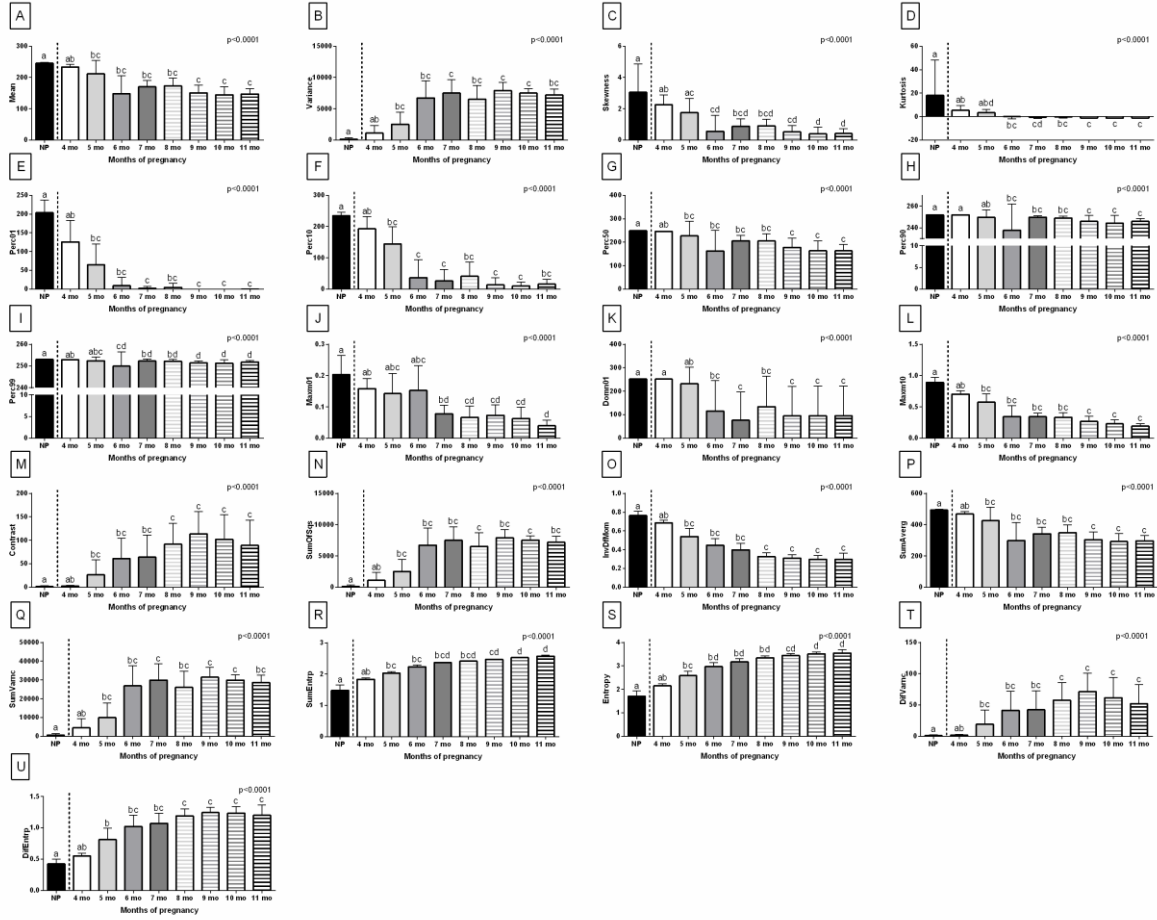

**Figure S1.** Twenty-one selected features (mean +SD) of the Histogram Statistics and Gray Level Co-occurrence Matrix for the Red component in the RGB color model compared between the non-pregnant group and pregnant group over consecutive months of pregnancy. Differences between groups were indicated with individual p-values when  $p < 0.05$ . Different superscripts (a, b, c, d) were statistically different. Consecutive plots represent (A) Mean; (B) Variance; (C) Skewness - skewness coefficient; (D) Kurtosis; (E) Perc01 - percentile 01; (F) Perc10 - percentile 10; (G) Perc50 - percentile 50; (H) Perc90 - percentile 90; (I) Perc99 - percentile 99; (J) Maxm01 - maximum of moment 01; (K) Domn01 - dominant 01; (L) Maxm10 - maximum of moment 10; (M) Contrast; (N) SumOfSqs - sum of squares; (O) InvDefMom - inverse different moment/homogeneity; (P) SumAverg - summation mean; (Q) SumVarnrc - summation variance; (R) SumEntrp - summation entropy; (S) Entropy; (T) DifVarnrc - differential variance; (U) DifEntrp - differential entropy.



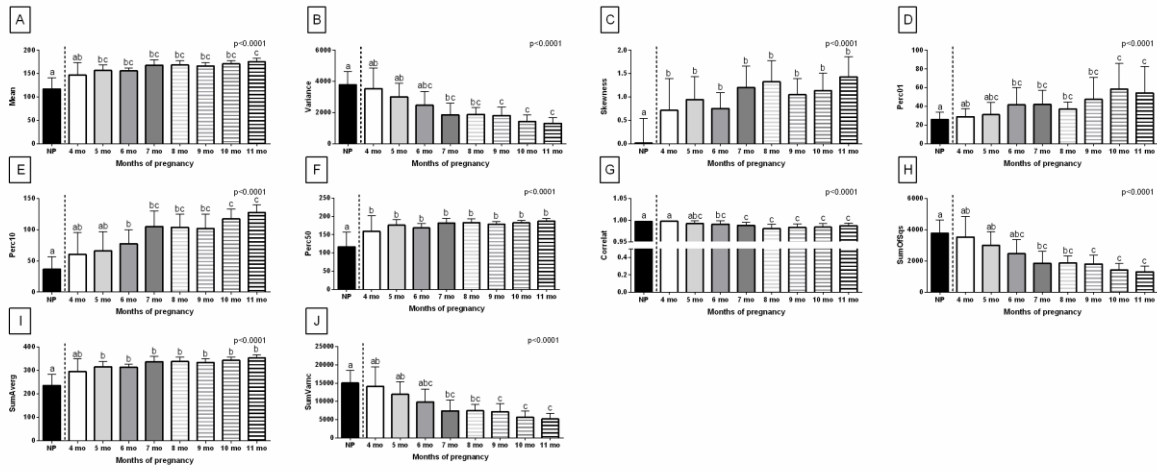

**Figure S2.** Ten selected features (mean +SD) of the Histogram Statistics and Gray Level Co-occurrence Matrix for the Green component in the RGB color model compared between the non-pregnant group and pregnant group over consecutive months of pregnancy. Differences between groups were indicated with individual p-value when  $p < 0.05$ . Different superscripts (a, b, c) were statistically different. Consecutive plots represent (A) Mean; (B) Variance; (C) Skewness - skewness coefficient; (D) Perc01 - percentile 01; (E) Perc10 - percentile 10; (F) Perc50 - percentile 50; (G) Correlat - correlation; (H) SumOfSqs - sum of squares; (I) SumAverg - summation mean; (J) SumVarn - summation variance.

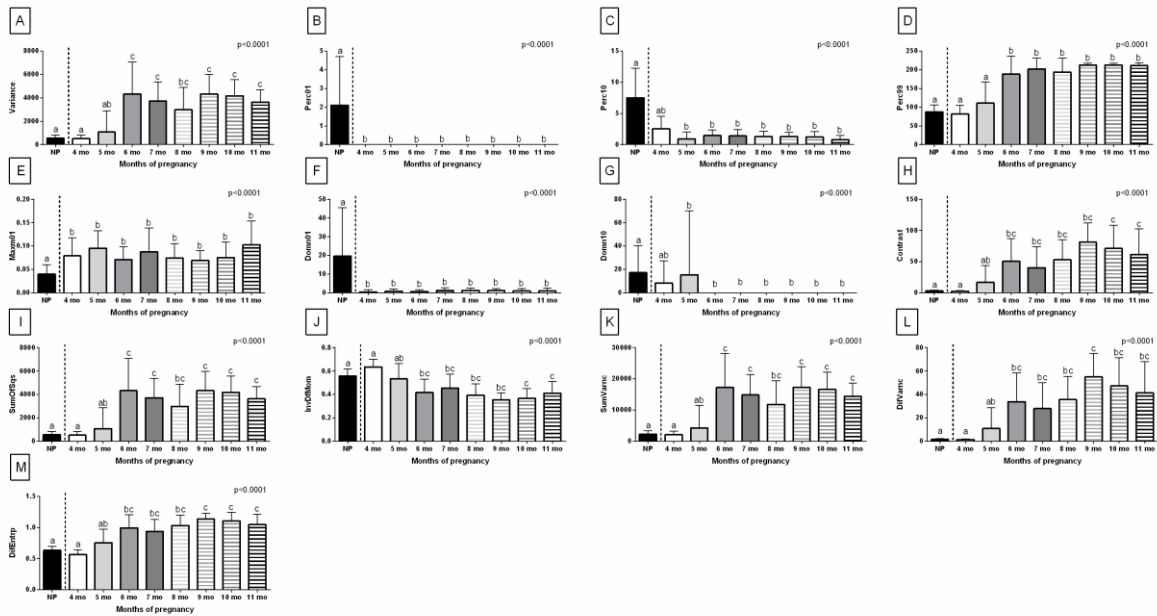

**Figure S3.** Thirteen selected features (mean +SD) of the Histogram Statistics and Gray Level Co-occurrence Matrix for the Blue component in the RGB color model compared between the non-pregnant group and pregnant group over consecutive months of pregnancy. Differences between groups were indicated with individual p-value when  $p < 0.05$ . Different superscripts within the pregnant group (a, b, c) were statistically different. Consecutive plots represent (A) Variance; (B) Perc01 - percentile 01; (C) Perc10 - percentile 10; (D) Perc99 - percentile 99; (E) Maxm01 - maximum of moment 01; (F) Domn01 - dominant 01; (G) Domn10 - dominant 10; (H) Contrast; (I) SumOfSqs - sum of squares; (J) InvDefMom - inverse different moment/homogeneity; (K) SumVarn - summation variance; (L) DifVarn - differential variance; (M) DifEntrp - differential entropy.

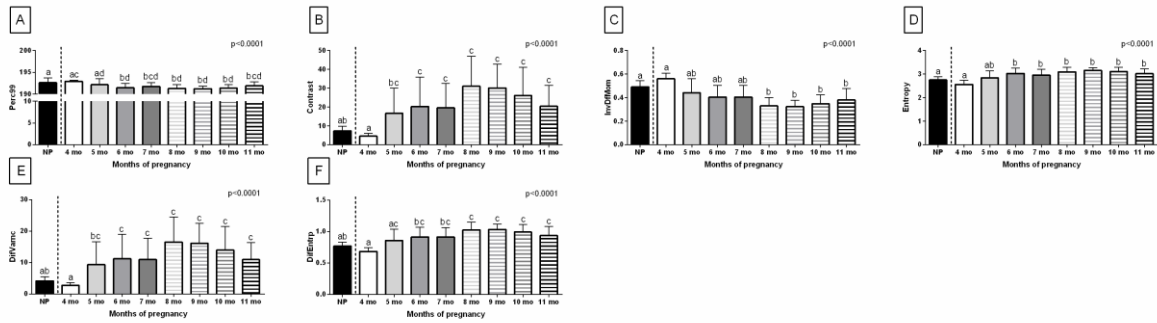

**Figure S4.** Six selected features (mean +SD) of the Histogram Statistics and Gray Level Co-occurrence Matrix for the Brightness component in the YUV/YIQ/HSB color models compared between the non-pregnant group and consecutive pregnant group over consecutive months of pregnancy. Differences between groups were indicated with individual p-value when  $p < 0.05$ . Different superscripts within pregnant (a, b, c, d) were statistically different. Consecutive plots represent (A) Perc99 - percentile 99; (B) Contrast; (C) InvDefMom - inverse different moment/homogeneity; (D) Entropy; (E) DifVarnc - differential variance; (F) DifEntrp - differential entropy.

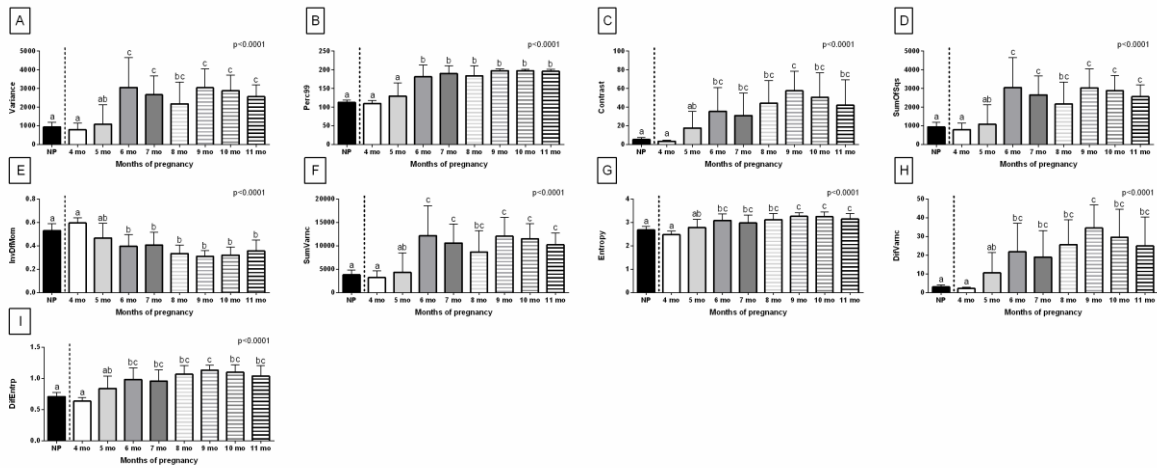

**Figure S5.** Nine selected features (mean +SD) of the Histogram Statistics and Gray Level Co-occurrence Matrix for the U-component in the YUV color model compared between the non-pregnant group and consecutive pregnant group over consecutive months of pregnancy. Differences between groups were indicated with individual p-value when  $p < 0.05$ . Different superscripts within pregnant (a, b, c) were statistically different. Consecutive plots represent (A) Variance; (B) Perc99 - percentile 99; (C) Contrast; (D) SumOfSqs - sum of squares; (E) InvDefMom - inverse different moment/homogeneity; (F) SumVarnc - summation variance; (G) Entropy; (H) DifVarnc - differential variance; (I) DifEntrp - differential entropy.

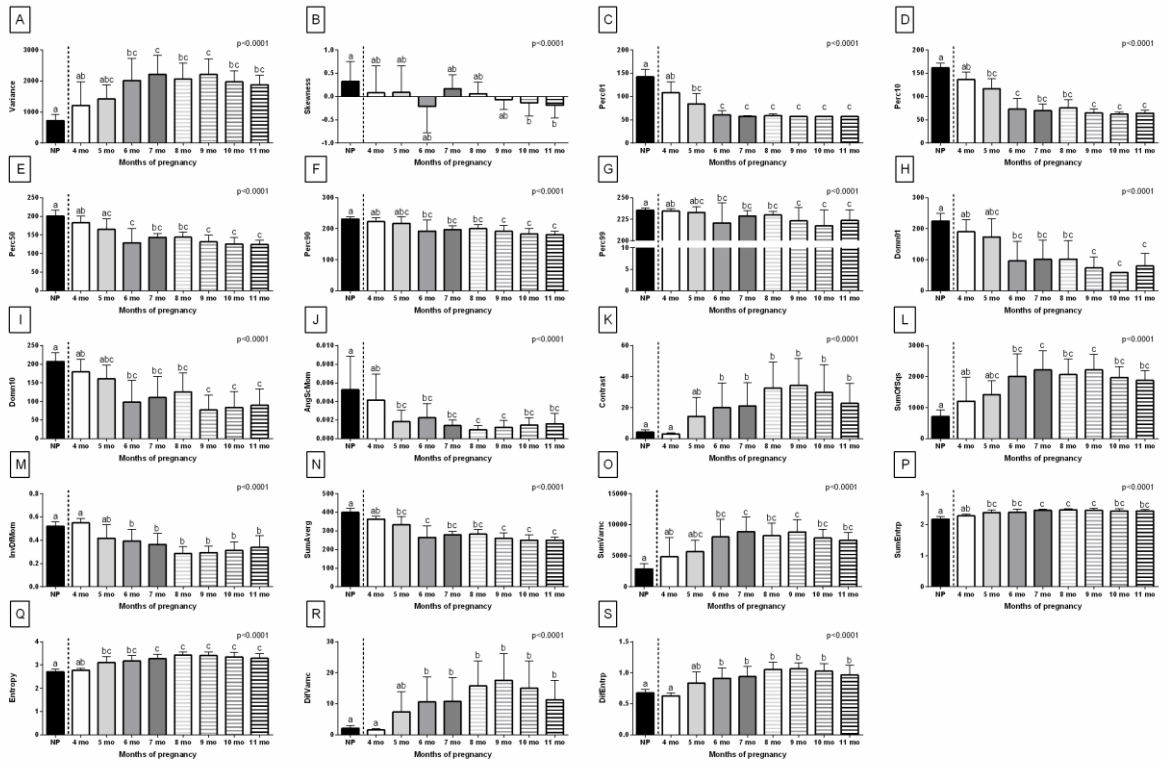

**Figure S6.** Nineteen selected features (mean +SD) of the Histogram Statistics and Gray Level Co-occurrence Matrix for the V-component in the YUV color model compared between the non-pregnant group and consecutive pregnant group over consecutive months of pregnancy. Differences between groups were indicated with individual p-value when  $p < 0.05$ . Different superscripts within pregnant (a, b, c) were statistically different. Consecutive plots represent (A) Variance; (B) Skewness - skewness coefficient; (C) Perc01 - percentile 01; (D) Perc10 - percentile 10; (E) Perc50 - percentile 50; (F) Perc90 - percentile 90; (G) Perc99 - percentile 99; (H) Domn01 - dominant 01; (I) Domn10 - dominant 10; (J) AngScMom - angular second moment/energy; (K) Contrast; (L) SumOfSqs - sum of squares; (M) InvDefMom - inverse different moment/homogeneity; (N) SumAverg - summation mean; (O) SumVarn - summation variance; (P) SumEntp - summation entropy; (Q) Entropy; (R) DifVarn - differential variance; (S) DifEntp - differential entropy.

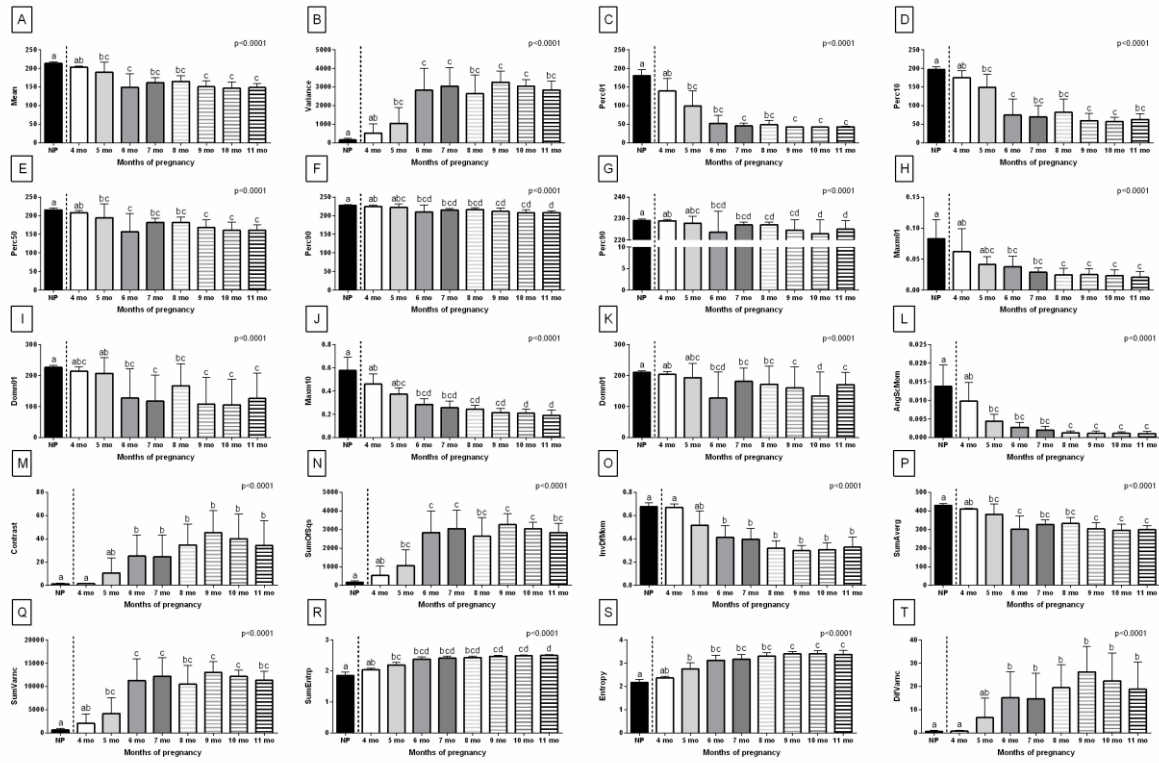

**Figure S7.** Twenty selected features (mean +SD) of the Histogram Statistics and Gray Level Co-occurrence Matrix for the I-component in the YIQ color model compared between the non-pregnant group and consecutive pregnant group over consecutive months of pregnancy. Differences between groups were indicated with individual p-value when  $p < 0.05$ . Different superscripts within pregnant (a, b, c, d) were statistically different. Consecutive plots represent (A) Mean; (B) Variance; (C) Perc01 - percentile 01; (D) Perc10 - percentile 10; (E) Perc50 - percentile 50; (F) Perc90 - percentile 90; (G) Perc99 - percentile 99; (H) Maxm01 - maximum of moment 01; (I) Domn01 - dominant 01; (J) Maxm10 - maximum of moment 10; (K) Domn10 - dominant 10; (L) AngScMom - angular second moment/energy; (M) Contrast; (N) SumOfSqs - sum of squares; (O) InvDefMom - inverse different moment/homogeneity; (P) SumAverg - summation mean; (Q) SumVarnrc - summation variance; (R) SumEntrp - summation entropy; (S) Entropy; (T) DifVarnrc - differential variance.

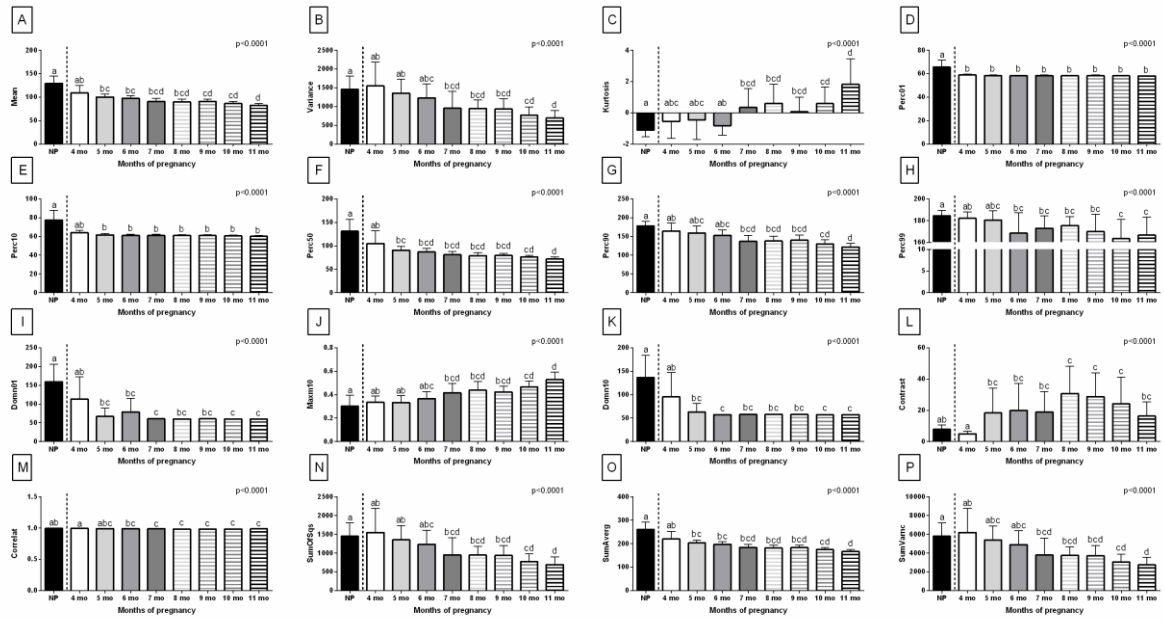

**Figure S8.** Sixteen selected features (mean +SD) of the Histogram Statistics and Gray Level Co-occurrence Matrix for the Q-component in the YIQ color model compared between the non-pregnant group and consecutive pregnant group over consecutive months of pregnancy. Differences between groups were indicated with individual p-value when  $p < 0.05$ . Different superscripts within pregnant (a, b, c, d) were statistically different. Consecutive plots represent (A) Mean; (B) Variance; (C) Kurtosis; (D) Perc01 - percentile 01; (E) Perc10 - percentile 10; (F) Perc50 - percentile 50; (G) Perc90 - percentile 90; (H) Perc99 - percentile 99; (I) Domn01 - dominant 01; (J) Maxm10 - maximum of moment 10; (K) Domn01 - dominant 01; (L) Contrast; (M) Correlat - correlation; (N) SumOfSqs - sum of squares; (O) SumAverg - summation mean; (P) SumVarnc - summation variance.

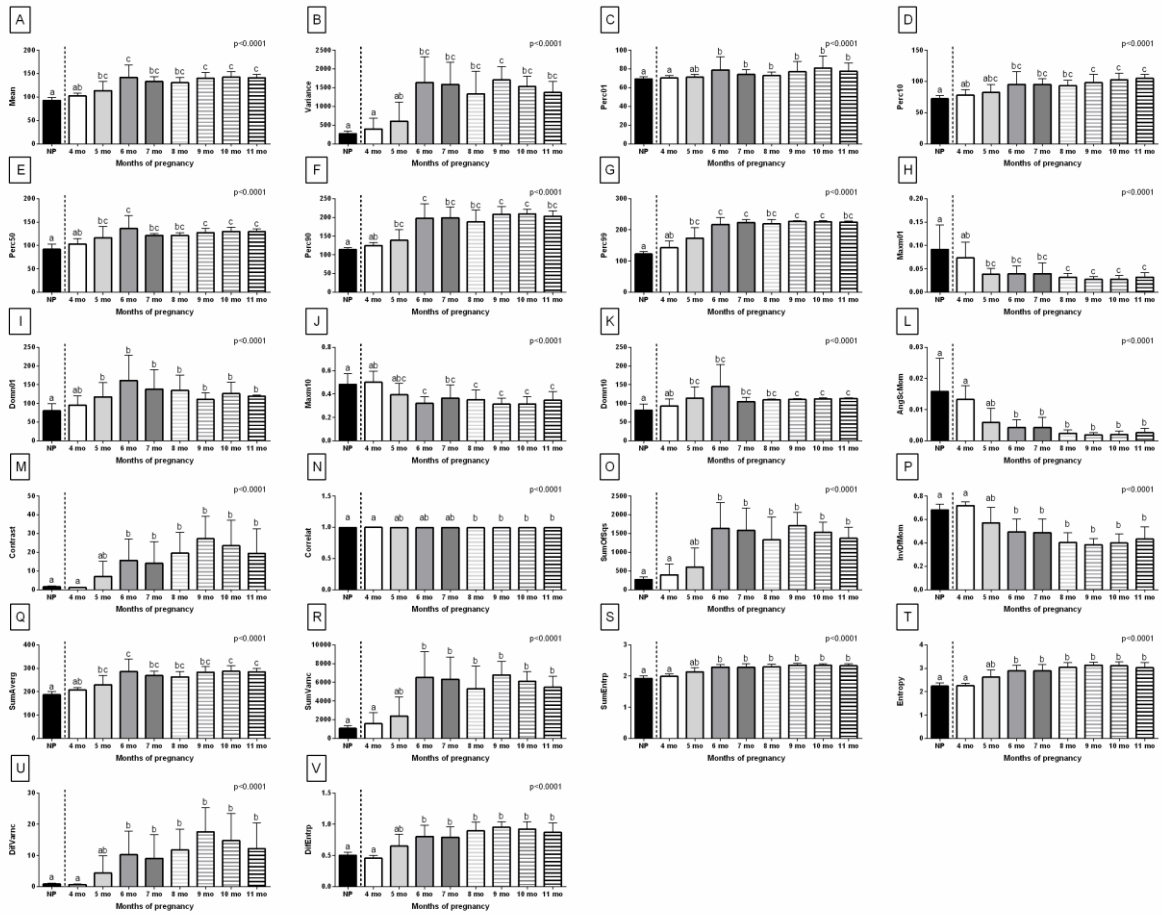

**Figure S9.** Twenty two selected features (mean +SD) of the Histogram Statistics and Gray Level Co-occurrence Matrix for the Hue component in the HSB color model compared between the non-pregnant group and consecutive pregnant group over consecutive months of pregnancy. Differences between groups were indicated with individual p-value when  $p < 0.05$ . Different superscripts within pregnant (a, b, c) were statistically different. Consecutive plots represent (A) Mean; (B) Variance; (C) Perc01 - percentile 01; (D) Perc10 - percentile 10; (E) Perc50 - percentile 50; (F) Perc90 - percentile 90; (G) Perc99 - percentile 99; (H) Maxm01 - maximum of moment 01; (I) Domn01 - dominant 01; (J) Maxm10 - maximum of moment 10; (K) Domn10 - dominant 10; (L) AngScMom - angular second moment/energy; (M) Contrast; (N) Correlat - correlation; (O) SumOfSqs - sum of squares; (P) InvDefMom - inverse different moment/homogeneity; (Q) SumAverg - summation mean; (R) SumVarn - summation variance; (S) SumEntr - summation entropy; (T) Entropy; (U) DifVarn - differential variance; (V) DifEntr - differential entropy.

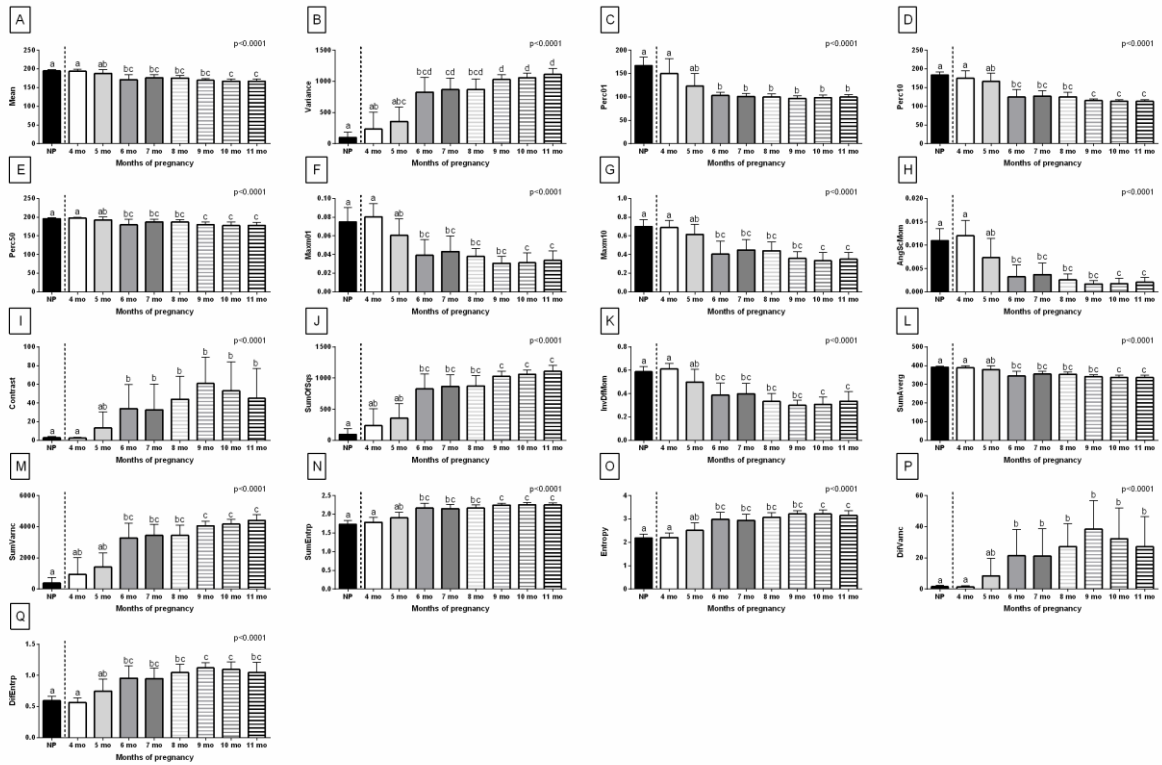

**Figure S10.** Seventeen selected features (mean +SD) of the Histogram Statistics and Gray Level Co-occurrence Matrix for the Saturation component in the HSB color model compared between the non-pregnant group and consecutive pregnant group over consecutive months of pregnancy. Differences between groups were indicated with individual p-value when  $p < 0.05$ . Different superscripts within pregnant (a, b, c, d) were statistically different. Consecutive plots represent (A) Mean; (B) Variance; (C) Perc01 - percentile 01; (D) Perc10 - percentile 10; (E) Perc50 - percentile 50; (F) Maxm01 - maximum of moment 01; (G) Maxm10 - maximum of moment 10; (H) AngScMom - angular second moment/energy; (I) Contrast; (J) SumOfSqs - sum of squares; (K) InvDefMom - inverse different moment/homogeneity; (L) SumAverg - summation mean; (M) SumVarnrc - summation variance; (N) SumEntpr - summation entropy; (O) Entropy; (P) DifVarnrc - differential variance; (Q) DifEntpr - differential entropy.
